# Supplementary material for: RAG1 Core and V(D)J Recombination Signal Sequences Were Derived from Transib Transposons
Source: PLOS journal article supplement (doi:10.1371/journal.pbio.0030181), 2005-05-17
Supplement: S2 (10.1371/journal.pbio.0030181.s002) [file journal.pbio.0030181.s002]

| **hAT family** | **gc content of the host genome**  **(%)** | **gc content of 35-bp insertion sites**  **(%)** | **gc content of 15-bp insertion sites**  **(%)** | **gc content of 8-bp target site duplications (%)** | **number of analyzed elements** |
| --- | --- | --- | --- | --- | --- |
| Pegasus1) | 44 | 45 | 44 | 51 | 34 |
| HATN4_AG2) | 44 | 47 | 52 | 45 | 14 |
| HAT2N_AG2) | 44 | 49 | 48 | 47 | 12 |
| Hobo3) | 42 | 38 | 38 | 41 | 20 |
| hAT-1N_DP4) | 46 | 41 | 46 | 40 | 19 |
| hAT-1N_SP5) | 37 | 30 | 31 | 27 | 41 |
| HAT1N_DR6) | 36 | 44 | 44 | 36 | 110 |
| HAT-2N1_DR6) | 36 | 35 | 33 | 39 | 47 |
| HAT-N19_DR6) | 36 | 34 | 33 | 28 | 41 |
| Average |  | 40 | 41 | 39 |  |
